# Supplementary material
Source: HighWire-hosted journal article supplement (https://srh.bmj.com/content/47/2/129)
Supplement: inline-supplementary-material-1 [file inline-supplementary-material-1.pdf]

## Supplementary data

Table 1. Sociodemographic, reproductive, physical and mental health information collected

| Variables                                                                                                                                                                                                                                | Categories                                                                                                       |
|------------------------------------------------------------------------------------------------------------------------------------------------------------------------------------------------------------------------------------------|------------------------------------------------------------------------------------------------------------------|
| <b><i>Sociodemographic</i></b>                                                                                                                                                                                                           |                                                                                                                  |
| Age                                                                                                                                                                                                                                      | In years (continuous)                                                                                            |
| Area of residence based on an index of distance to the nearest urban centre                                                                                                                                                              | Urban vs. rural                                                                                                  |
| Highest level of education                                                                                                                                                                                                               | Less than Year 12; year 12 or equivalent, certificate/diploma; university degree                                 |
| Marital status                                                                                                                                                                                                                           | Single; married/defacto partnership                                                                              |
| Ability to manage on income                                                                                                                                                                                                              | Easy/not bad; difficult some of the time; difficult all of the time/ impossible                                  |
| Health Care Card - offers concessions on some health services including cheaper prescription medicines subsidised by the Australian government and free general practitioner visits. This was used as a proxy for socioeconomic position | Yes vs. No                                                                                                       |
| <b><i>Reproductive and sexual health</i></b>                                                                                                                                                                                             |                                                                                                                  |
| History of live births                                                                                                                                                                                                                   | Yes vs. No                                                                                                       |
| History of miscarriage                                                                                                                                                                                                                   | Yes vs. No                                                                                                       |
| History of termination                                                                                                                                                                                                                   | Yes vs. No                                                                                                       |
| History of unplanned pregnancy – women were also asked if they had ever been pregnant by accident. Available from Survey 2 onwards.                                                                                                      | Yes vs. No                                                                                                       |
| Pregnancy history – new variable combining history of live births, miscarriages, terminations, and unplanned pregnancies                                                                                                                 | Ever pregnant vs. Never pregnant                                                                                 |
| History of sexually transmitted infections (STIs) including chlamydia, genital herpes, genital warts or gonorrhoea.                                                                                                                      | Responses were combined into one variable to describe women's history of STIs, dichotomised into 'yes' vs. 'no'. |

| Variables                                                                                                                                                                                                                                                                                                                                                                   | Categories                                                                                                                                                        |
|-----------------------------------------------------------------------------------------------------------------------------------------------------------------------------------------------------------------------------------------------------------------------------------------------------------------------------------------------------------------------------|-------------------------------------------------------------------------------------------------------------------------------------------------------------------|
| <b>Health and health behaviours</b>                                                                                                                                                                                                                                                                                                                                         |                                                                                                                                                                   |
| Body mass index BMI (kg/m <sup>2</sup> ) - calculated based on women's self-reported height (cm) and body weight (kg) and classified according to the World Health Organization's guidelines.                                                                                                                                                                               | Underweight (<18.5kg/m <sup>2</sup> ), normal weight (18.5-24.9 kg/m <sup>2</sup> ) overweight (25 to <30 kg/m <sup>2</sup> ) and obese (≥30 kg/m <sup>2</sup> ). |
| Smoking                                                                                                                                                                                                                                                                                                                                                                     | Never, ex-smoker, current smoker                                                                                                                                  |
| Alcohol consumption                                                                                                                                                                                                                                                                                                                                                         | None/rarely vs. current drinker                                                                                                                                   |
| General Health using an item from the 36-item Short Form health survey (SF-36)                                                                                                                                                                                                                                                                                              | Excellent/very good; good; fair/poor                                                                                                                              |
| <b>Mental Health</b>                                                                                                                                                                                                                                                                                                                                                        |                                                                                                                                                                   |
| Psychological distress in the past four weeks were assessed using the validated Kessler 10 (K-10) scale. The 10-item scale measures symptoms on a five-point scale (1= <i>none of the time</i> to 5= <i>all of the time</i> ). Lower scores indicate better functioning. Scores 30 and above suggest severe depression and/or anxiety (classified as 'very high distress'). | Low (scores 10-15); moderate (scores 16-21); high distress (scores 22-29) and very high distress (scores 30-50)                                                   |

Table 2. Physical and mental health characteristics of young Australian women when first surveyed in 2013 according to contraceptive method (N = 4952)

|                        | <b>Pill</b><br><b>N = 2948</b> | <b>LARC</b><br><b>N = 625</b> | <b>Condom</b><br><b>N = 823</b> | <b>Other</b><br><b>N = 134</b> | <b>None</b><br><b>N = 422</b> | <b>p</b> |
|------------------------|--------------------------------|-------------------------------|---------------------------------|--------------------------------|-------------------------------|----------|
| BMI <sup>a</sup>       |                                |                               |                                 |                                |                               | <.0001   |
| Underweight            | 230 ( 7.8)                     | 26 ( 4.2)                     | 70 ( 8.6)                       | 8 ( 6.0)                       | 32 ( 7.7)                     |          |
| Normal                 | 1952 (66.4)                    | 340 (54.7)                    | 480 (58.7)                      | 66 (49.3)                      | 232 (55.5)                    |          |
| Overweight             | 517 (17.6)                     | 147 (23.6)                    | 155 (18.9)                      | 40 (29.9)                      | 79 (18.9)                     |          |
| Obese                  | 241 ( 8.2)                     | 109 (17.5)                    | 113 (13.8)                      | 20 (14.9)                      | 75 (17.9)                     |          |
| Smoking                |                                |                               |                                 |                                |                               | <.0001   |
| Never                  | 2064 (70.0)                    | 386 (61.8)                    | 525 (63.8)                      | 73 (54.5)                      | 209 (49.5)                    |          |
| Ex-smoker              | 556 (18.9)                     | 127 (20.3)                    | 162 (19.7)                      | 30 (22.4)                      | 100 (23.7)                    |          |
| Current                | 328 (11.1)                     | 112 (17.9)                    | 136 (16.5)                      | 31 (23.1)                      | 113 (26.8)                    |          |
| Alcohol consumption    |                                |                               |                                 |                                |                               | <.0001   |
| No/rarely              | 2042 (69.3)                    | 397 (63.5)                    | 522 (63.4)                      | 100 (74.6)                     | 242 (57.3)                    |          |
| Yes                    | 906 (30.7)                     | 228 (36.5)                    | 301 (36.6)                      | 34 (25.4)                      | 180 (42.7)                    |          |
| SF-36 General health   |                                |                               |                                 |                                |                               | <.0001   |
| Excellent              | 1477 (50.1)                    | 260 (41.6)                    | 392 (47.6)                      | 53 (39.6)                      | 166 (39.3)                    |          |
| Good                   | 1111 (37.7)                    | 239 (38.2)                    | 311 (37.8)                      | 57 (42.5)                      | 177 (41.9)                    |          |
| Fair/Poor              | 360 (12.2)                     | 126 (20.2)                    | 120 (14.6)                      | 24 (17.9)                      | 79 (18.7)                     |          |
| Psychological distress |                                |                               |                                 |                                |                               | 0.0004   |
| Low                    | 739 (25.1)                     | 151 (24.2)                    | 179 (21.7)                      | 26 (19.4)                      | 74 (17.6)                     |          |
| Moderate               | 968 (32.8)                     | 188 (30.1)                    | 253 (30.7)                      | 45 (33.6)                      | 126 (29.9)                    |          |
| High                   | 761 (25.8)                     | 154 (24.6)                    | 217 (26.4)                      | 34 (25.4)                      | 124 (29.5)                    |          |
| Very high              | 480 (16.3)                     | 132 (21.1)                    | 174 (21.1)                      | 29 (21.6)                      | 97 (23.0)                     |          |

<sup>a</sup>Underweight (<18.5 kg/m<sup>2</sup>); Normal (18.5 to <25 kg/m<sup>2</sup>); Overweight (25 to <30 kg/m<sup>2</sup>); Obese (≥30 kg/m<sup>2</sup>)

Table 3. Longitudinal associations between physical health, health behaviours and mental health and contraceptive use and non-use among women who have *never* been pregnant

|                        | Pill versus                                  |                                                |                                               |                                                  |
|------------------------|----------------------------------------------|------------------------------------------------|-----------------------------------------------|--------------------------------------------------|
|                        | LARC<br>Adjusted OR <sup>a</sup><br>(95% CI) | Condom<br>Adjusted OR <sup>a</sup><br>(95% CI) | Other<br>Adjusted OR <sup>a</sup><br>(95% CI) | Non-user<br>Adjusted OR <sup>a</sup><br>(95% CI) |
| <b>Never pregnant</b>  |                                              |                                                |                                               |                                                  |
| BMI                    |                                              |                                                |                                               |                                                  |
| Underweight            | 0.83 (0.62-1.11)                             | 1.24 (0.97-1.57)                               | 0.80 (0.42-1.50)                              | 1.33 (0.98-1.81)                                 |
| Normal                 | 1                                            | 1                                              | 1                                             | 1                                                |
| Overweight             | <b>1.32 (1.14-1.40)</b>                      | <b>1.22 (1.06-1.40)</b>                        | <b>1.74 (1.33-2.26)</b>                       | 1.13 (0.94-1.36)                                 |
| Obese                  | <b>1.72 (1.41-2.09)</b>                      | <b>1.39 (1.15-1.68)</b>                        | <b>1.87 (1.30-2.70)</b>                       | <b>1.92 (1.56-2.36)</b>                          |
| Smoking                |                                              |                                                |                                               |                                                  |
| Never                  | 1                                            | 1                                              | 1                                             | 1                                                |
| Ex-smoker              | 0.90 (0.74-1.09)                             | 1.18 (1.00-1.39)                               | <b>1.47 (1.06-2.09)</b>                       | <b>1.32 (1.06-1.65)</b>                          |
| Current                | <b>1.30 (1.08-1.57)</b>                      | <b>1.36 (1.15-1.60)</b>                        | <b>1.76 (1.26-2.44)</b>                       | <b>2.16 (1.76-2.65)</b>                          |
| Alcohol consumption    |                                              |                                                |                                               |                                                  |
| No/rarely              | 1                                            | 1                                              | 1                                             | 1                                                |
| Yes                    | 0.97 (0.86-1.10)                             | <b>1.14 (1.01-1.27)</b>                        | 1.00 (0.79-1.27)                              | <b>1.34 (1.16-1.54)</b>                          |
| SF-36 General health   |                                              |                                                |                                               |                                                  |
| Excellent              | 1                                            | 1                                              | 1                                             | 1                                                |
| Good                   | 1.00 (0.89-1.13)                             | 0.97 (0.87-1.09)                               | 0.98 (0.78-1.24)                              | 1.04 (0.90-1.20)                                 |
| Fair/Poor              | <b>1.50 (1.26-1.78)</b>                      | <b>1.20 (1.02-1.41)</b>                        | 1.26 (0.89-1.79)                              | <b>1.31 (1.06-1.61)</b>                          |
| Psychological distress |                                              |                                                |                                               |                                                  |
| Low                    | 1                                            | 1                                              | 1                                             | 1                                                |
| Moderate               | 1.00 (0.87-1.15)                             | 1.00 (0.88-1.14)                               | <b>1.41 (1.10-1.82)</b>                       | 1.08 (0.91-1.28)                                 |
| High                   | 1.04 (0.89-1.21)                             | 1.15 (1.00-1.33)                               | 1.30 (0.96-1.75)                              | 1.18 (0.98-1.43)                                 |
| Very high              | <b>1.44 (1.19-1.73)</b>                      | <b>1.40 (1.17-1.67)</b>                        | <b>1.48 (1.04-2.11)</b>                       | <b>1.67 (1.35-2.08)</b>                          |

<sup>a</sup>Adjusted for age, marital status, education and area of residence

Table 4. Longitudinal associations between physical health, health behaviours and mental health and contraceptive use and non-use among women who have *ever* been pregnant with a history of unplanned pregnancy or terminations

| Ever pregnant +<br>History of unplanned<br>pregnancy/termination | Pill versus                                  |                                                |                                               |                                                  |
|------------------------------------------------------------------|----------------------------------------------|------------------------------------------------|-----------------------------------------------|--------------------------------------------------|
|                                                                  | LARC<br>Adjusted OR <sup>a</sup><br>(95% CI) | Condom<br>Adjusted OR <sup>a</sup><br>(95% CI) | Other<br>Adjusted OR <sup>a</sup><br>(95% CI) | Non-user<br>Adjusted OR <sup>a</sup><br>(95% CI) |
| BMI                                                              |                                              |                                                |                                               |                                                  |
| Underweight                                                      | 0.52 (0.24-1.09)                             | 0.90 (0.45-1.80)                               | 0.33 (0.10-1.09)                              | 0.71 (0.40-1.26)                                 |
| Normal                                                           | 1                                            | 1                                              | 1                                             | 1                                                |
| Overweight                                                       | 1.12 (0.77-1.62)                             | 0.67 (0.45-1.00)                               | 0.54 (0.29-1.00)                              | 0.98 (0.70-1.38)                                 |
| Obese                                                            | <b>1.63 (1.06-2.53)</b>                      | 1.14 (0.76-1.71)                               | 1.00 (0.54-1.85)                              | <b>1.53 (1.04-2.24)</b>                          |
| Smoking                                                          |                                              |                                                |                                               |                                                  |
| Never                                                            | 1                                            | 1                                              | 1                                             | 1                                                |
| Ex-smoker                                                        | 0.88 (0.59-1.32)                             | 1.17 (0.78-1.77)                               | 0.92 (0.51-1.66)                              | 1.29 (0.90-1.86)                                 |
| Current                                                          | 1.06 (0.75-1.49)                             | 1.07 (0.73-1.57)                               | 0.86 (0.49-1.51)                              | 1.06 (0.75-1.49)                                 |
| Alcohol consumption                                              |                                              |                                                |                                               |                                                  |
| No/rarely                                                        | 1                                            | 1                                              | 1                                             | 1                                                |
| Yes                                                              | 1.01 (0.76-1.35)                             | 0.89 (0.67-1.19)                               | <b>0.59 (0.37-0.94)</b>                       | 1.25 (0.96-1.62)                                 |
| SF-36 General health                                             |                                              |                                                |                                               |                                                  |
| Excellent                                                        | 1                                            | 1                                              | 1                                             | 1                                                |
| Good                                                             | 0.88 (0.64-1.21)                             | <b>0.66 (0.48-0.90)</b>                        | <b>0.57 (0.34-0.94)</b>                       | 0.93 (0.69-1.25)                                 |
| Fair/Poor                                                        | 1.00 (0.67-1.48)                             | 0.78 (0.52-1.16)                               | 1.03 (0.57-1.88)                              | 0.96 (0.66-1.40)                                 |
| Psychological distress                                           |                                              |                                                |                                               |                                                  |
| Low                                                              | 1                                            | 1                                              | 1                                             | 1                                                |
| Moderate                                                         | 0.99 (0.68-1.43)                             | 1.15 (0.78-0.71)                               | 1.24 (0.66-2.34)                              | 1.01 (0.70-1.46)                                 |
| High                                                             | 0.94 (0.63-1.39)                             | 0.87 (0.58-1.31)                               | 0.97 (0.52-1.82)                              | 0.88 (0.61-1.28)                                 |
| Very high                                                        | 1.02 (0.65-1.58)                             | 0.78 (0.50-1.22)                               | 1.29 (0.66-2.52)                              | 0.93 (0.62-1.39)                                 |

<sup>a</sup>Adjusted for age, marital status, education and area of residence
